# Supplementary material for: Predictive Modelling of Current and Future Potential Distribution of the Spectacled Bear (Tremarctos ornatus) in Amazonas, Northeast Peru
Source: Animals (Basel). 2020 Oct 6;10(10):1816. doi: 10.3390/ani10101816 (PMC7650621; doi:10.3390/ani10101816)
Supplement: Supplementary file 1 [file animals-10-01816-s001.docx]

Supplementary Materials

Predictive modelling of current and future potential distribution of the spectacled bear (*Tremarctos ornatus*) in Amazonas, northeast Peru

Gerson Meza Mori 1, *, Elgar Barboza Castillo 1, Cristóbal Torres Guzmán 1, Dany A. Cotrina Sánchez 1, Betty K. Guzman Valqui 1, Manuel Oliva 1, Subhajit Bandopadhyay 2, Rolando Salas López 1 and Nilton B. Rojas Briceño 1, *

1 Instituto de Investigación para el Desarrollo Sustentable de Ceja de Selva (INDES-CES), Universidad Nacional Toribio Rodríguez de Mendoza de Amazonas (UNTRM), Chachapoyas 01001, Perú; [ebarboza@indes-ces.edu.pe](mailto:ebarboza@indes-ces.edu.pe) (E.B.C.); [cristobal.torres@untrm.edu.pe](mailto:cristobal.torres@untrm.edu.pe) (C.T.G.); alexander.cotrina@untrm.edu.pe (D.A.C.S.); betty.guzman@untrm.edu.pe (B.K.G.V.), [soliva@indes-ces.edu.pe](mailto:soliva@indes-ces.edu.pe) (M.O.); [rsalas@indes-ces.edu.pe](mailto:rsalas@indes-ces.edu.pe) (R.S.L.)

2 Department of Ecology and Environmental Protection; Poznan University of Life Sciences; Piatkowska 94; 60-649 Poznan; Poland; [subhajit.bandopadhyay@up.poznan.pl](mailto:subhajit.bandopadhyay@up.poznan.pl) (S.B.)

***** Correspondence: [gmeza@indes-ces.edu.pe](mailto:gmori@indes-ces.edu.pe); Tel.: +51-996-907-768; [nrojas@indes-ces.edu.pe](mailto:nrojas@indes-ces.edu.pe) (N.B.R.B.); Tel.: +51-949-667-638

Received: date; Accepted: date; Published: date

**Table S1.** Pearson's correlation coefficients (r) between the bioclimatic variables for the modelling of the potential distribution of *T. ornatus* in Amazonas (Peru).

|  | bio01 | bio02 | bio03 | bio04 | bio05 | bio06 | bio07 | bio08 | bio09 | bio10 | bio11 | bio12 | bio13 | bio14 | bio15 | bio16 | bio17 | bio18 | bio19 |
| --- | --- | --- | --- | --- | --- | --- | --- | --- | --- | --- | --- | --- | --- | --- | --- | --- | --- | --- | --- |
| bio01 | 1 | -0.309 | -0.665 | 0.594 | 0.990 | 0.989 | -0.065 | 0.999 | 1.000 | 0.999 | 1.000 | -0.909 | -0.938 | -0.681 | 0.209 | -0.925 | -0.662 | -0.906 | -0.643 |
| bio02 | -0.309 | 1 | 0.628 | -0.021 | -0.180 | -0.437 | 0.933 | -0.306 | -0.315 | -0.300 | -0.315 | 0.302 | 0.457 | 0.061 | 0.261 | 0.445 | 0.044 | 0.429 | 0.040 |
| bio03 | -0.665 | 0.628 | 1 | -0.490 | -0.622 | -0.695 | 0.306 | -0.666 | -0.662 | -0.667 | -0.662 | 0.560 | 0.750 | 0.186 | 0.303 | 0.713 | 0.181 | 0.647 | 0.168 |
| bio04 | 0.594 | -0.021 | -0.490 | 1 | 0.621 | 0.551 | 0.209 | 0.613 | 0.574 | 0.618 | 0.572 | -0.558 | -0.501 | -0.410 | 0.247 | -0.517 | -0.395 | -0.402 | -0.372 |
| bio05 | 0.990 | -0.180 | -0.622 | 0.621 | 1 | 0.960 | 0.072 | 0.990 | 0.989 | 0.992 | 0.989 | -0.891 | -0.907 | -0.679 | 0.232 | -0.894 | -0.662 | -0.874 | -0.643 |
| bio06 | 0.989 | -0.437 | -0.695 | 0.551 | 0.960 | 1 | -0.209 | 0.988 | 0.990 | 0.987 | 0.990 | -0.903 | -0.947 | -0.660 | 0.176 | -0.935 | -0.640 | -0.919 | -0.621 |
| bio07 | -0.065 | 0.933 | 0.306 | 0.209 | 0.072 | -0.209 | 1 | -0.062 | -0.075 | -0.054 | -0.074 | 0.105 | 0.209 | -0.018 | 0.183 | 0.210 | -0.035 | 0.223 | -0.034 |
| bio08 | 0.999 | -0.306 | -0.666 | 0.613 | 0.990 | 0.988 | -0.062 | 1 | 0.998 | 0.999 | 0.998 | -0.912 | -0.938 | -0.686 | 0.217 | -0.927 | -0.667 | -0.902 | -0.648 |
| bio09 | 1.000 | -0.315 | -0.662 | 0.574 | 0.989 | 0.990 | -0.075 | 0.998 | 1 | 0.998 | 1.000 | -0.907 | -0.939 | -0.678 | 0.204 | -0.925 | -0.659 | -0.909 | -0.640 |
| bio10 | 0.999 | -0.300 | -0.667 | 0.618 | 0.992 | 0.987 | -0.054 | 0.999 | 0.998 | 1 | 0.998 | -0.908 | -0.934 | -0.679 | 0.215 | -0.922 | -0.661 | -0.900 | -0.641 |
| bio11 | 1.000 | -0.315 | -0.662 | 0.572 | 0.989 | 0.990 | -0.074 | 0.998 | 1.000 | 0.998 | 1 | -0.908 | -0.940 | -0.679 | 0.205 | -0.926 | -0.661 | -0.910 | -0.642 |
| bio12 | -0.909 | 0.302 | 0.560 | -0.558 | -0.891 | -0.903 | 0.105 | -0.912 | -0.907 | -0.908 | -0.908 | 1 | 0.919 | 0.870 | -0.454 | 0.954 | 0.861 | 0.932 | 0.853 |
| bio13 | -0.938 | 0.457 | 0.750 | -0.501 | -0.907 | -0.947 | 0.209 | -0.938 | -0.939 | -0.934 | -0.940 | 0.919 | 1 | 0.638 | -0.078 | 0.990 | 0.617 | 0.954 | 0.607 |
| bio14 | -0.681 | 0.061 | 0.186 | -0.410 | -0.679 | -0.660 | -0.018 | -0.686 | -0.678 | -0.679 | -0.679 | 0.870 | 0.638 | 1 | -0.787 | 0.700 | 0.993 | 0.703 | 0.991 |
| bio15 | 0.209 | 0.261 | 0.303 | 0.247 | 0.232 | 0.176 | 0.183 | 0.217 | 0.204 | 0.215 | 0.205 | -0.454 | -0.078 | -0.787 | 1 | -0.172 | -0.807 | -0.210 | -0.807 |
| bio16 | -0.925 | 0.445 | 0.713 | -0.517 | -0.894 | -0.935 | 0.210 | -0.927 | -0.925 | -0.922 | -0.926 | 0.954 | 0.990 | 0.700 | -0.172 | 1 | 0.684 | 0.964 | 0.676 |
| bio17 | -0.662 | 0.044 | 0.181 | -0.395 | -0.662 | -0.640 | -0.035 | -0.667 | -0.659 | -0.661 | -0.661 | 0.861 | 0.617 | 0.993 | -0.807 | 0.684 | 1 | 0.690 | 0.999 |
| bio18 | -0.906 | 0.429 | 0.647 | -0.402 | -0.874 | -0.919 | 0.223 | -0.902 | -0.909 | -0.900 | -0.910 | 0.932 | 0.954 | 0.703 | -0.210 | 0.964 | 0.690 | 1 | 0.684 |
| bio19 | -0.643 | 0.040 | 0.168 | -0.372 | -0.643 | -0.621 | -0.034 | -0.648 | -0.640 | -0.641 | -0.642 | 0.853 | 0.607 | 0.991 | -0.807 | 0.676 | 0.999 | 0.684 | 1 |

**Table S2.** Area (in km2 and %) of the total potential distribution predicted both in current conditions and in the climate change scenarios of the spectacled bear according to the functional unit of the ecosystem it encompasses and the area that is protected by the Natural Area modalities Protected in Amazonas (Peru).

| **Model** | **Habitat potential** | **Area**  **(km2)** | **Functional units of the ecosystem 1, 2** | | | | | | | | | |  | **Protected natural area modalities 1, 3** | | | | | | |
| --- | --- | --- | --- | --- | --- | --- | --- | --- | --- | --- | --- | --- | --- | --- | --- | --- | --- | --- | --- | --- |
| **B-aY** | **B-bY** | **Bes-in** | **B-mY** | **Jal** | **Ma** | **PH** | **Vsec** | **Agri** | **Others** |  | **NP** | **NS** | **CR** | **RZ** | **RCA** | **PCA** | **Total** |
| 3337.79 | 16455.08 | 936.38 | 7988.75 | 1439.05 | 325.42 | 1478.62 | 2936.23 | 392.59 | 461.36 |  | 884.77 | 392.16 | 1185.65 | 1403.37 | 628.74 | 1482.34 | 5977.03 |
| Current | High | 836.22 | 105.14  *12.6 (3.1)* | 7.35  0.9 (0) | 44.28  *5.3 (4.7)* | 71.39  *8.5 (0.9)* | 237.35  *28.4 (16.5)* | 37.19  *4.4 (11.4)* | 140.07  *16.8 (9.5)* | 191.15  *22.9 (6.5)* | 0.37  *0 (0.1)* | 1.93  *0 (0.4)* |  | 0.00  *0 (0)* | 19.08  *2.3 (4.9)* | 6.25  *0.7 (0.5)* | 0.00  *0 (0)* | 23.25  *2.8 (3.7)* | 39.90  *4.8 (2.7)* | 88.48  *10.6 (1.5)* |
| Moderate | 6081.88 | 1281.59  *21.1 (38.4*) | 119.54  *2.0 (0.7)* | 259.56  *4.3 (27.7)* | 1193.70  *19.6 (14.9)* | 815.68  *13.4 (56.7)* | 235.39  *3.9 (72.3)* | 889.68  *14.6 (60.2)* | 1262.38  *20.8 (43.0)* | 18.10  *0.3 (4.6)* | 6.27  *0.3 (1.4)* |  | 0.01  *0 (0)* | 28.21  *0.5 (7.2)* | 6.38  *0.1 (0.5)* | 0.34  *0 (0)* | 193.31  *3.2 (30.7)* | 414.04  *6.8 (27.9)* | 642.29  *10.6 (10.7)* |
| Low | 8718.98 | 1920.05  *22 (57.5)* | 307.33  *3.5 (1.9)* | 332.13  *3.8 (35.5)* | 4275.95  *49.0 (53.5)* | 354.46  *4.1 (24.6)* | 49.28  *0.6 (15.1)* | 430.51  *4.9 (29.1)* | 940.56  *10.8 (32.0)* | 98.78  *1.1 (25.2)* | 9.92  *1.1 (2.2)* |  | 29.64  *0.3 (3.3)* | 144.39  *1.7 (36.8)* | 54.98  *0.6 (4.6)* | 76.29  *0.9 (5.4)* | 397.66  *4.6 (63.2)* | 973.44  *11.2 (65.7)* | 1676.41  *19.2 (28)* |
| *Total* | 15637.08 | 3306.78  *21.0 (99.1)* | 434.22  *2.8 (2.6)* | 635.97  *4.1 (67.9)* | 5541.04  *35.4 (69.4)* | 1407.49  *9.0 (97.8)* | 321.86  *2.1 (98.9)* | 1460.26  *9.3 (98.8)* | 2394.09  *15.3 (81.5)* | 117.25  *0.7 (29.9)* | 18.13  *0.7 (3.9)* |  | 29.65  *0.2 (3.4)* | 191.69  *1.2 (48.9)* | 67.61  *0.4 (5.7)* | 76.63  *0.5 (5.5)* | 614.22  *3.9 (97.7)* | 1427.39  *9.1 (96.3)* | 2407.19  *15.4 (40.3)* |
| 2050  RCP 2.6 | High | 1291.78 | 149.09  *11.5 (4.5)* | 14.46  *1.1 (0.1)* | 17.73  *1.4 (1.9)* | 137.82  *10.7 (1.7)* | 311.42  *24.1 (21.6)* | 64.40  *5.0 (19.8)* | 190.56  *14.8 (12.9)* | 405.87  *31.4 (13.8)* | 0.29  *0 (0.1)* | 0.12  *0 (0)* |  | 0.00  *0 (0)* | 3.36  *0.3 (0.9)* | 2.27  *0.2 (0.2)* | 0.02  *0 (0)* | 55.53  *4.3 (8.8)* | 98.50  *7.6 (6.6)* | 159.68  *12.4 (2.7)* |
| Moderate | 5138.23 | 1035.73  *20.2 (31)* | 130.03  *2.5 (0.8)* | 127.05  *2.5 (13.6)* | 1045.12  *20.3 (13.1)* | 681.72  *13.3 (47.4)* | 140.36  *2.7 (43.1)* | 843.89  *16.4 (57.1)* | 1115.24  *21.7 (38.0)* | 13.96  *0.3 (3.6)* | 5.14  *0.3 (1.1)* |  | 0.06  *0 (0)* | 42.08  *0.8 (10.7)* | 20.27  *0.4 (1.7)* | 1.55  *0 (0.1)* | 102.02  *2.0 (16.2)* | 316.01  *6.2 (21.3)* | 481.99  *9.4 (8.1)* |
| Low | 8090.52 | 1946.76  *24.1 (58.3)* | 387.06  *4.8 (2.4)* | 403.16  *5.0 (43.1)* | 3697.62  *45.7 (46.3)* | 242.11  *3.0 (16.8)* | 107.63  *1.3 (33.1)* | 419.15  *5.2 (28.3)* | 768.83  *9.5 (26.2)* | 105.36  *1.3 (26.8)* | 12.84  *1.3 (2.8)* |  | 80.21  *1.0 (9.1)* | 198.38  *2.5 (50.6)* | 112.81  *1.4 (9.5)* | 65.95  *0.8 (4.7)* | 277.78  *3.4 (44.2)* | 844.03  *10.4 (56.9)* | 1579.16  *19.5 (26.4)* |
| *Total* | 14520.53 | 3131.59  *21.6 (93.8)* | 531.55  *3.7 (3.2)* | 547.94  *3.8 (58.5)* | 4880.56  *33.6 (61.1)* | 1235.26  *8.5 (85.8)* | 312.39  *2.2 (96.0)* | 1453.60  *10.0 (98.3)* | 2289.94  *15.8 (78.0)* | 119.61  *0.8 (30.5)* | 18.10  *0.8 (3.9)* |  | 80.27  *0.6 (9.1)* | 243.83  *1.7 (62.2)* | 135.35  *0.9 (11.4)* | 67.53  *0.5 (4.8)* | 435.32  *3.0 (69.2)* | 1258.53  *8.7 (84.9)* | 2220.83  *15.3 (37.2)* |
| 2050  RCP 4.5 | High | 1182.01 | 181.37  *15.3 (5.4)* | 4.51  *0.4 (0)* | 10.68  *0.9 (1.1)* | 61.98  *5.2 (0.8)* | 554.97  *47.0 (38.6)* | 32.24  *2.7 (9.9)* | 81.08  *6.9 (5.5)* | 254.97  *21.6 (8.7)* | 0.14  *0 (0)* | 0.07  *0 (0)* |  | 0.00  *0 (0)* | 10.54  *0.9 (2.7)* | 3.53  *0.3 (0.3)* | 0.05  *0 (0)* | 27.00  *2.3 (4.3)* | 151.21  *12.8 (10.2)* | 192.33  *16.3 (3.2)* |
| Moderate | 4841.07 | 1265.33  *26.1 (37.9)* | 103.67  *2.1 (0.6)* | 176.25  *3.6 (18.8)* | 770.57  *15.9 (9.6)* | 535.87  *11.1 (37.2)* | 210.05  *4.3 (64.5)* | 656.63  *13.6 (44.4)* | 1108.45  *22.9 (37.8)* | 9.12  *0.2 (2.3)* | 5.13  *0.2 (1.1)* |  | 0.00  *0 (0)* | 47.08  *1.0 (12.0)* | 20.11  *0.4 (1.7)* | 2.06  *0 (0.1)* | 142.46  *2.9 (22.7)* | 321.16  *6.6 (21.7)* | 532.88  *11.0 (8.9)* |
| Low | 7886.08 | 1705.35  *21.6 (51.1)* | 381.83  *4.8 (2.3)* | 342.72  *4.3 (36.6)* | 3508.02  *44.5 (43.9)* | 211.32  *2.7 (14.7)* | 75.93  *1.0 (23.3)* | 704.65  *8.9 (47.7)* | 869.18  *11.0 (29.6)* | 77.80  *1.0 (19.8)* | 9.29  *1.0 (2.0)* |  | 2.57  *0 (0.3)* | 191.63  *2.4 (48.9)* | 110.81  *1.4 (9.3)* | 72.54  *0.9 (5.2)* | 254.09  *3.2 (40.4)* | 809.09  *10.3 (54.6)* | 1440.72  *18.3 (24.1)* |
| *Total* | 13909.16 | 3152.04  *22.7 (94.4)* | 490.01  *3.5 (3.0)* | 529.65  *3.8 (56.6)* | 4340.57  *31.2 (54.3)* | 1302.16  *9.4 (90.5)* | 318.21  *2.3 (97.8)* | 1442.36  *10.4 (97.5)* | 2232.60  *16.1 (76.0)* | 87.06  *0.6 (22.2)* | 14.49  *0.6 (3.1)* |  | 2.57  *0 (0.3)* | 249.25  *1.8 (63.6)* | 134.45  *1.0 (11.3)* | 74.65  *0.5 (5.3)* | 423.55  *3.0 (67.4)* | 1281.45  *9.2 (86.4)* | 2165.93  *15.6 (36.2)* |
| 2050  RCP 6.0 | High | 1110.70 | 124.43  *11.2 (3.7)* | 13.59  *1.2 (0.1)* | 16.00  *1.4 (1.7)* | 121.81  *11.0 (1.5)* | 347.94  *31.3 (24.2)* | 46.60  *4.2 (14.3)* | 106.82  *9.6 (7.2)* | 333.13  *30.0 (11.3)* | 0.34  *0 (0.1)* | 0.04  *0 (0)* |  | 0.00  *0 (0)* | 3.72  *0.3 (0.9)* | 1.65  *0.1 (0.1)* | 0.04  *0 (0)* | 26.37  *2.4 (4.2)* | 97.62  *8.8 (6.6)* | 129.40  *11.6 (2.2)* |
| Moderate | 5636.84 | 1310.00  *23.2 (39.2)* | 142.13  *2.5 (0.9)* | 216.70  *3.8 (23.1)* | 917.56  *16.3 (11.5)* | 749.95  *13.3 (52.1)* | 214.69  *3.8 (66.0)* | 872.94  *15.5 (59.0)* | 1189.81  *21.1 (40.5)* | 17.15  *0.3 (4.4)* | 5.91  *0.3 (1.3)* |  | 0.00  *0 (0)* | 38.50  *0.7 (9.8)* | 10.78  *0.2 (0.9)* | 2.57  *0 (0.2)* | 130.94  *2.3 (20.8)* | 413.17  *7.3 (27.9)* | 595.96  *10.6 (10.0)* |
| Low | 7978.52 | 1815.49  *22.8 (54.4)* | 312.98  *3.9 (1.9)* | 327.77  *4.1 (35.0)* | 3876.68  *48.6 (48.5)* | 276.98  *3.5 (19.2)* | 58.83  *0.7 (18.1)* | 476.41  *6.0 (32.2)* | 751.41  *9.4 (25.6)* | 73.74  *0.9 (18.8)* | 8.24  *0.9 (1.8)* |  | 0.74  *0 (0.1)* | 177.37  *2.2 (45.2)* | 89.06  *1.1 (7.5)* | 66.63  *0.8 (4.7)* | 324.08  *4.1 (51.5)* | 874.31  *11.0 (59.0)* | 1532.18  *19.2 (25.6)* |
| *Total* | 14726.06 | 3249.92  *22.1 (97.4)* | 468.71  *3.2 (2.8)* | 560.46  *3.8 (59.9)* | 4916.05  *33.4 (61.5)* | 1374.86  *9.3 (95.5)* | 320.11  *2.2 (98.4)* | 1456.18  *9.9 (98.5)* | 2274.34  *15.4 (77.5)* | 91.22  *0.6 (23.2)* | 14.20  *0.6 (3.1)* |  | 0.74  *0 (0.1)* | 219.59  *1.5 (56.0)* | 101.49  *0.7 (8.6)* | 69.23  *0.5 (4.9)* | 481.38  *3.3 (76.6)* | 1385.11  *9.4 (93.4)* | 2257.53  *15.3 (37.8)* |
| 2050  RCP 8.5 | High | 1380.81 | 159.67  *11.6 (4.8)* | 7.74  *0.6 (0)* | 7.58  *0.5 (0.8)* | 165.32  *12.0 (2.1)* | 533.46  *38.6 (37.1)* | 30.74  *2.2 (9.4)* | 153.55  *11.1 (10.4)* | 322.68  *23.4 (11.0)* | 0.07  *0 (0)* | 0.01  *0 (0)* |  | 0.00  *0 (0)* | 8.44  *0.6 (2.2)* | 1.29  *0.1 (0.1)* | 0.13  *0 (0)* | 41.61  *3.0 (6.6)* | 116.41  *8.4 (7.9)* | 167.89  *12.2 (2.8)* |
| Moderate | 5237.86 | 1113.67  *21.3 (33.4)* | 133.37  *2.5 (0.8)* | 136.22  *2.6 (14.5)* | 1118.97  *21.4 (14.0)* | 556.47  *10.6 (38.7)* | 172.42  *3.3 (53.0)* | 820.06  *15.7 (55.5)* | 1171.52  *22.4 (39.9)* | 11.43  *0.2 (2.9)* | 3.73  *0.2 (0.8)* |  | 0.00  *0 (0)* | 75.41  *1.4 (19.2)* | 27.28  *0.5 (2.3)* | 13.20  *0.3 (0.9)* | 164.12  *3.1 (26.1)* | 314.51  *6.0 (21.2)* | 594.52  *11.4 (9.9)* |
| Low | 8520.09 | 1877.54  *22 (56.3)* | 378.23  *4.4 (2.3)* | 324.96  *3.8 (34.7)* | 4182.29  *49.1 (52.4)* | 283.38  *3.3 (19.7)* | 107.65  *1.3 (33.1)* | 471.07  *5.5 (31.9)* | 826.02  *9.7 (28.1)* | 59.11  *0.7 (15.1)* | 9.85  *0.7 (2.1)* |  | 0.96  *0 (0.1)* | 171.63  *2 (43.8)* | 102.88  *1.2 (8.7)* | 129.89  *1.5 (9.3)* | 358.20  *4.2 (57.0)* | 913.16  *10.7 (61.6)* | 1676.71  *19.7 (28.1)* |
| *Total* | 15138.76 | 3150.87  *20.8 (94.4)* | 519.33  *3.4 (3.2)* | 468.76  *3.1 (50.1)* | 5466.58  *36.1 (68.4)* | 1373.31  *9.1 (95.4)* | 310.82  *2.1 (95.5)* | 1444.68  *9.5 (97.7)* | 2320.23  *15.3 (79)* | 70.60  *0.5 (18.0)* | 13.58  *0.5 (2.9)* |  | 0.96  *0 (0.1)* | 255.48  *1.7 (65.1)* | 131.45  *0.9 (11.1)* | 143.22  *0.9 (10.2)* | 563.93  *3.7 (89.7)* | 1344.08  *8.9 (90.7)* | 2439.12  *16.1 (40.8)* |
| 2070  RCP 2.6 | High | 1241.46 | 147.91  *11.9 (4.4)* | 15.18  *1.2 (0.1)* | 47.34  *3.8 (5.1)* | 106.99  *8.6 (1.3)* | 353.22  *28.5 (24.5)* | 88.96  *7.2 (27.3)* | 132.88  *10.7 (9.0)* | 346.67  *27.9 (11.8)* | 1.22  *0.1 (0.3)* | 1.10  *0.1 (0.2)* |  | 0.00  *0 (0)* | 4.92  *0.4 (1.3)* | 4.98  *0.4 (0.4)* | 0.06  *0 (0)* | 48.23  *3.9 (7.7)* | 106.22  *8.6 (7.2)* | 164.42  *13.2 (2.8)* |
| Moderate | 5108.22 | 1201.35  *23.5 (36.0)* | 125.93  *2.5 (0.8)* | 209.68  *4.1 (22.4)* | 975.91  *19.1 (12.2)* | 667.45  *13.1 (46.4)* | 178.93  *3.5 (55.0)* | 679.93  *13.3 (46.0)* | 1045.73  *20.5 (35.6)* | 14.79  *0.3 (3.8)* | 8.53  *0.3 (1.8)* |  | 0.00  *0 (0)* | 73.81  *1.4 (18.8)* | 21.67  *0.4 (1.8)* | 2.59  *0.1 (0.2)* | 120.49  *2.4 (19.2)* | 384.82  *7.5 (26)* | 603.38  *11.8 (10.1)* |
| Low | 8114.29 | 1805.11  *22.2 (54.1)* | 347.16  *4.3 (2.1)* | 256.77  *3.2 (27.4)* | 3844.72  *47.4 (48.1)* | 272.12  *3.4 (18.9)* | 51.17  *0.6 (15.7)* | 630.19  *7.8 (42.6)* | 829.25  *10.2 (28.2)* | 72.59  *0.9 (18.5)* | 5.22  *0.9 (1.1)* |  | 0.07  *0 (0)* | 176.12  *2.2 (44.9)* | 101.26  *1.2 (8.5)* | 112.22  *1.4 (8.0)* | 335.05  *4.1 (53.3)* | 809.14  *10.0 (54.6)* | 1533.86  *18.9 (25.7)* |
| *Total* | 14463.97 | 3154.37  *21.8 (94.5)* | 488.27  *3.4 (3)* | 513.78  *3.6 (54.9)* | 4927.62  *34.1 (61.7)* | 1292.78  *8.9 (89.8)* | 319.06  *2.2 (98)* | 1442.99  *10.0 (97.6)* | 2221.65  *15.4 (75.7)* | 88.60  *0.6 (22.6)* | 14.84  *0.6 (3.2)* |  | 0.07  *0 (0)* | 254.85  *1.8 (65.0)* | 127.90  *0.9 (10.8)* | 114.87  *0.8 (8.2)* | 503.77  *3.5 (80.1)* | 1300.19  *9.0 (87.7)* | 2301.66  *15.9 (38.5)* |
| 2070  RCP 4.5 | High | 1320.69 | 201.84  *15.3 (6.0)* | 5.85  *0.4 (0)* | 26.52  *2.0 (2.8)* | 100.94  *7.6 (1.3)* | 514.19  *38.9 (35.7)* | 36.33  *2.8 (11.2)* | 127.62  *9.7 (8.6)* | 303.74  *23.0 (10.3)* | 1.01  *0.1 (0.3)* | 2.66  *0.1 (0.6)* |  | 0.00  *0 (0)* | 9.42  *0.7 (2.4)* | 4.26  *0.3 (0.4)* | 0.02  *0 (0)* | 33.21  *2.5 (5.3)* | 131.72  *10.0 (8.9)* | 178.64  *13.5 (3.0)* |
| Moderate | 5007.23 | 1296.22  *25.9 (38.8)* | 99.67  *2.0 (0.6)* | 232.66  *4.6 (24.8)* | 738.74  *14.8 (9.2)* | 561.73  *11.2 (39.0)* | 189.16  *3.8 (58.1)* | 790.33  *15.8 (53.5)* | 1076.40  *21.5 (36.7)* | 14.86  *0.3 (3.8)* | 7.46  *0.3 (1.6)* |  | 0.04  *0 (0)* | 47.96  *1.0 (12.2)* | 19.60  *0.4 (1.7)* | 0.63  *0 (0)* | 143.38  *2.9 (22.8)* | 313.46  *6.3 (21.1)* | 525.06  *10.5 (8.8)* |
| Low | 7808.02 | 1722.72  *22.1 (51.6)* | 373.11  *4.8 (2.3)* | 294.19  *3.8 (31.4)* | 3628.05  *46.5 (45.4)* | 238.01  *3.0 (16.5)* | 93.70  *1.2 (28.8)* | 526.57  *6.7 (35.6)* | 856.37  *11.0 (29.2)* | 70.82  *0.9 (18.0)* | 4.46  *0.9 (1.0)* |  | 23.98  *0.3 (2.7)* | 156.14  *2.0 (39.8)* | 72.50  *0.9 (6.1)* | 45.34  *0.6 (3.2)* | 321.88  *4.1 (51.2)* | 855.67  *11.0 (57.7)* | 1475.51  *18.9 (24.7)* |
| *Total* | 14135.94 | 3220.79  *22.8 (96.5)* | 478.62  *3.4 (2.9)* | 553.37  *3.9 (59.1)* | 4467.73  *31.6 (55.9)* | 1313.94  *9.3 (91.3)* | 319.19  *2.3 (98.1)* | 1444.52  *10.2 (97.7)* | 2236.51  *15.8 (76.2)* | 86.69  *0.6 (22.1)* | 14.58  *0.6 (3.2)* |  | 24.02  *0.2 (2.7)* | 213.52  *1.5 (54.4)* | 96.36  *0.7 (8.1)* | 46.00  *0.3 (3.3)* | 498.47  *3.5 (79.3)* | 1300.85  *9.2 (87.8)* | 2179.21  *15.4 (36.5)* |
| 2070  RCP 6.0 | High | 1313.54 | 186.66  *14.2 (5.6)* | 6.29  *0.5 (0)* | 11.03  *0.8 (1.2)* | 131.37  *10.0 (1.6)* | 558.49  *42.5 (38.8)* | 21.66  *1.6 (6.7)* | 102.62  *7.8 (6.9)* | 291.67  *22.2 (9.9)* | 0.84  *0.1 (0.2)* | 2.91  *0.1 (0.6)* |  | 0.00  *0 (0)* | 14.16  *1.1 (3.6)* | 2.27  *0.2 (0.2)* | 0.01  *0 (0)* | 23.24  *1.8 (3.7)* | 146.72  *11.2 (9.9)* | 186.40  *14.2 (3.1)* |
| Moderate | 4479.66 | 1141.55  *25.5 (34.2)* | 105.67  *2.4 (0.6)* | 153.28  *3.4 (16.4)* | 829.28  *18.5 (10.4)* | 491.32  *11.0 (34.1)* | 161.47  *3.6 (49.6)* | 588.46  *13.1 (39.8)* | 992.74  *22.2 (33.8)* | 9.34  *0.2 (2.4)* | 6.55  *0.2 (1.4)* |  | 0.00  *0 (0)* | 53.81  *1.2 (13.7)* | 19.91  *0.4 (1.7)* | 2.16  *0 (0.2)* | 127.59  *2.8 (20.3)* | 284.10  *6.3 (19.2)* | 487.58  *10.9 (8.2)* |
| Low | 7584.25 | 1688.97  *22.3 (50.6)* | 403.72  *5.3 (2.5)* | 334.53  *4.4 (35.7)* | 3171.80  *41.8 (39.7)* | 193.87  *2.6 (13.5)* | 126.60  *1.7 (38.9)* | 721.06  *9.5 (48.8)* | 876.82  *11.6 (29.9)* | 62.63  *0.8 (16.0)* | 4.24  *0.8 (0.9)* |  | 31.30  *0.4 (3.5)* | 173.33  *2.3 (44.2)* | 92.34  *1.2 (7.8)* | 73.90  *1.0 (5.3)* | 293.65  *3.9 (46.7)* | 696.12  *9.2 (47.0)* | 1360.64  *17.9 (22.8)* |
| *Total* | 13377.45 | 3017.18  *22.6 (90.4)* | 515.68  *3.9 (3.1)* | 498.85  *3.7 (53.3)* | 4132.46  *30.9 (51.7)* | 1243.68  *9.3 (86.4)* | 309.73  *2.3 (95.2)* | 1412.13  *10.6 (95.5)* | 2161.23  *16.2 (73.6)* | 72.81  *0.5 (18.5)* | 13.70  *0.5 (3.0)* |  | 31.30  *0.2 (3.5)* | 241.29  *1.8 (61.5)* | 114.52  *0.9 (9.7)* | 76.07  *0.6 (5.4)* | 444.49  *3.3 (70.7)* | 1126.94  *8.4 (76.0)* | 2034.62  *15.2 (34.0)* |
| 2070  RCP 8.5 | High | 1228.92 | 166.66  *13.6 (5.0)* | 12.01  *1.0 (0.1)* | 31.82  *2.6 (3.4)* | 94.16  *7.7 (1.2)* | 438.54  *35.7 (30.5)* | 54.18  *4.4 (16.6)* | 164.03  *13.3 (11.1)* | 265.86  *21.6 (9.1)* | 0.70  *0.1 (0.2)* | 0.96  *0.1 (0.2)* |  | 0.00  *0 (0)* | 1.36  *0.1 (0.3)* | 2.00  *0.2 (0.2)* | 0.24  *0 (0)* | 33.81  *2.8 (5.4)* | 108.79  *8.9 (7.3)* | 146.19  *11.9 (2.4)* |
| Moderate | 5648.26 | 1292.19  *22.9 (38.7)* | 141.28  *2.5 (0.9)* | 238.49  *4.2 (25.5)* | 1015.76  *18.0 (12.7)* | 651.79  *11.5 (45.3)* | 206.30  *3.7 (63.4)* | 879.71  *15.6 (59.5)* | 1199.18  *21.2 (40.8)* | 16.30  *0.3 (4.2)* | 7.25  *0.3 (1.6)* |  | 0.00  *0 (0)* | 54.77  *1.0 (14.0)* | 16.21  *0.3 (1.4)* | 15.84  *0.3 (1.1)* | 213.32  *3.8 (33.9)* | 343.06  *6.1 (23.1)* | 643.20  *11.4 (10.8)* |
| Low | 8435.83 | 1788.28  *21.2 (53.6)* | 334.71  *4.0 (2.0)* | 391.69  *4.6 (41.8)* | 4091.83  *48.5 (51.2)* | 278.72  *3.3 (19.4)* | 58.96  *0.7 (18.1)* | 414.80  *4.9 (28.1)* | 915.28  *10.8 (31.2)* | 151.22  *1.8 (38.5)* | 10.33  *1.8 (2.2)* |  | 4.17  *0 (0.5)* | 189.56  *2.2 (48.3)* | 99.43  *1.2 (8.4)* | 99.24  *1.2 (7.1)* | 372.00  *4.4 (59.2)* | 869.36  *10.3 (58.6)* | 1633.76  *19.4 (27.3)* |
| *Total* | 15313.01 | 3247.13  *21.2 (97.3)* | 488.00  *3.2 (3.0)* | 662.00  *4.3 (70.7)* | 5201.75  *34.0 (65.1)* | 1369.05  *8.9 (95.1)* | 319.45  *2.1 (98.2)* | 1458.54  *9.5 (98.6)* | 2380.32  *15.5 (81.1)* | 168.23  *1.1 (42.9)* | 18.54  *1.1 (4.0)* |  | 4.17  *0 (0.5)* | 245.68  *1.6 (62.6)* | 117.63  *0.8 (9.9)* | 115.33  *0.8 (8.2)* | 619.13  *4.0 (98.5)* | 1321.21  *8.6 (89.1)* | 2423.15  *15.8 (40.5)* |
| IUCN | Extant | 6018.68 | 1594.54  *26.5 (47.8)* | 1179.97  *19.6 (7.2)* | 3.09  *0.1 (0.3)* | 1256.61  *20.9 (15.7)* | 623.52  *10.4 (43.3)* | 41.93  *0.7 (12.9)* | 737.57  *12.3 (49.9)* | 572.64  *9.5 (19.5)* | 3.76  *0.1 (1.0)* | 5.06  *0.1 (1.1)* |  | 0.00  *0 (0)* | 0.00  *0 (0)* | 0.00  *0 (0)* | 0.00  *0 (0)* | 7.86  *0.1 (1.2)* | 732.63  *12.2 (49.4)* | 740.49  *12.3 (12.4)* |

1 The area in km2 in normal font and its meaning in percentage (%) in italics. Without parentheses the percentage (%) with respect to the area of the potential habitat range and in parentheses the percentage (%) with respect to the area of the NPA modalities

2 B-aY: Yunga Altimontane (Pluvial) Forest, B-bY: Yunga Basimontane Forest, Bes-in: Seasonally dry inter-Andean forest, B-mY: Yunga mountain forest, Jal: Jalca, Ma: Andean scrub, PH: Grasslands/Herbazales, Vsec: Secondary Vegetation, Agri: Agricultural Zone, and others.

3 NP: National Park, NS: National Sanctuary, CR: Communal Reserves, RZ: Reserved Areas, RCA: Regional Conservation Areas, PCA: Private Conservation Areas.


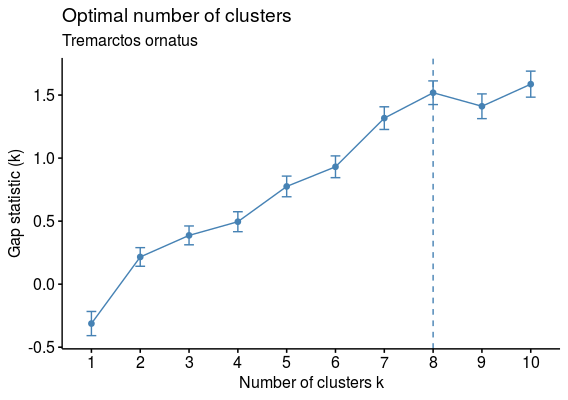


(a)


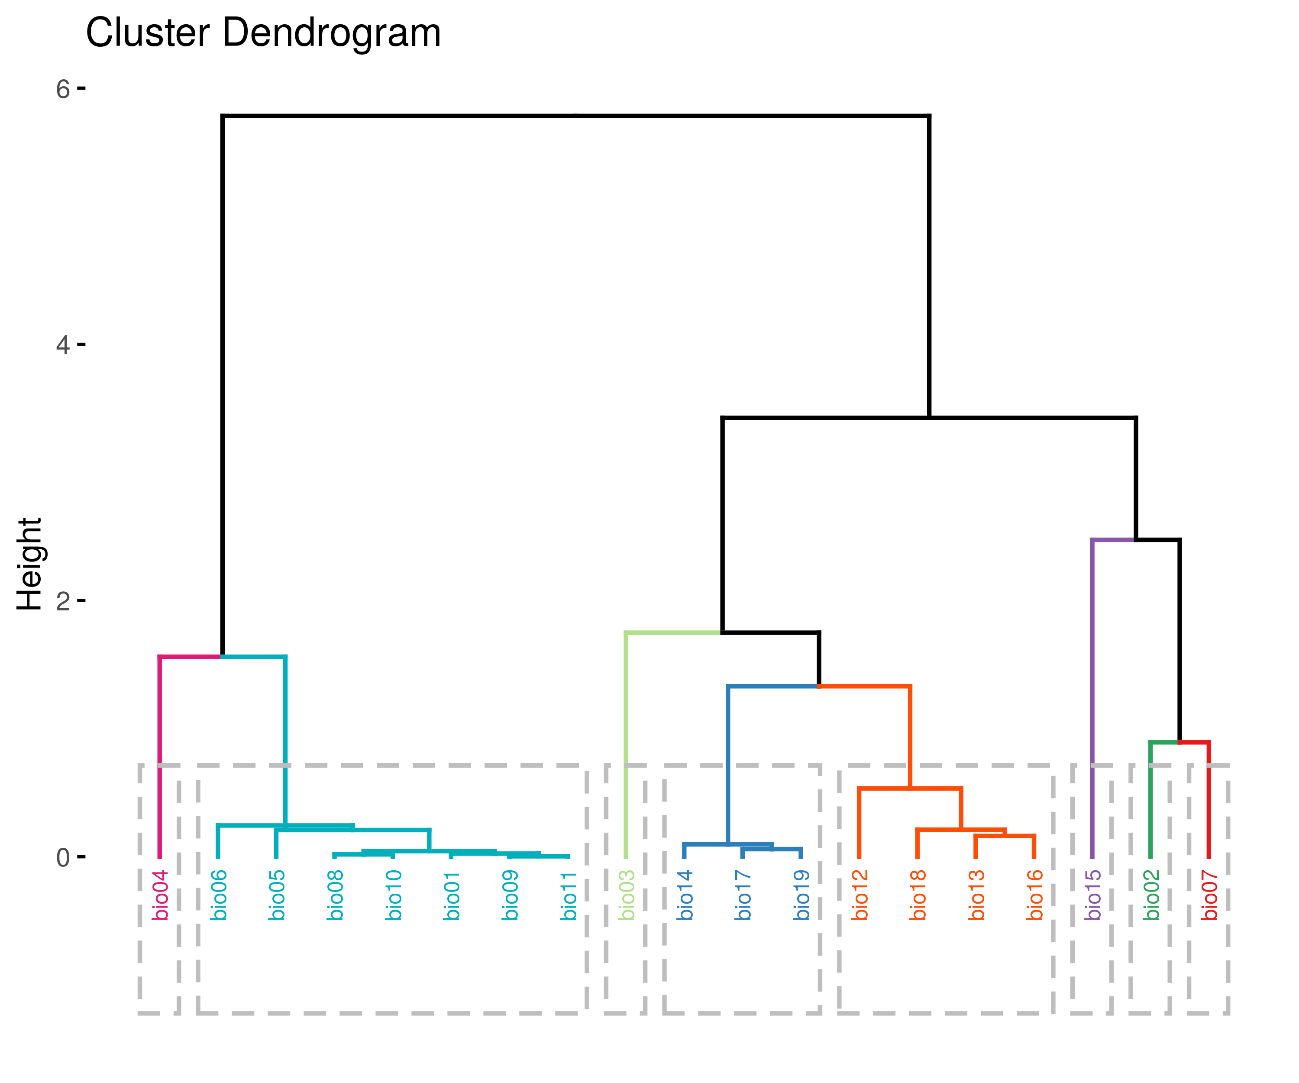


(b)

**Figure S1. (a)** Optimal number of clusters and **(b)** Cluster dendrogram between the bioclimatic variables for the modeling of the potential distribution of *T. ornatus a* in Amazonas (Peru).


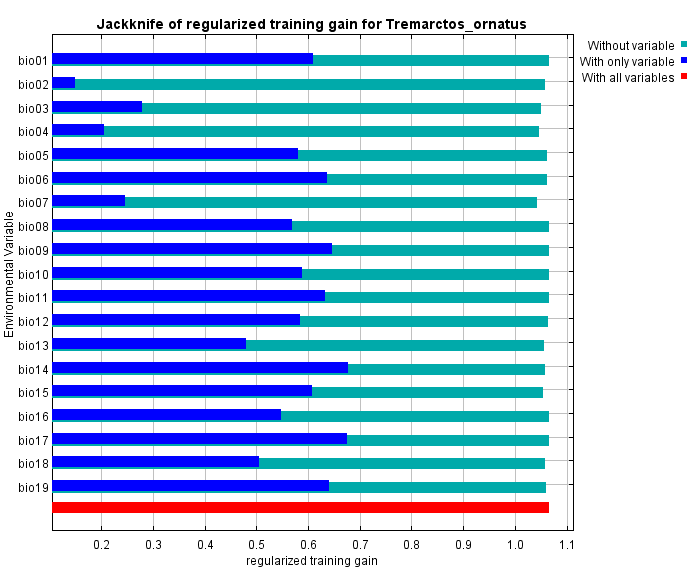


**Figure S3.** Jackknife test in a preliminary model generated using only the 19 bioclimatic variables for the modeling of the potential distribution of *T. ornatus a* in Amazonas (Peru). Regularized training gain without variable (green), with only variable (blue) and with all variables (red).
